# Supplementary material for: Ancestral allele of DNA polymerase gamma modifies antiviral tolerance
Source: PubMed Central journal article supplement (PMC11041766; doi:10.1038/s41586-024-07260-z), 2024-04-03

---

**Supplementary information**

---

**Ancestral allele of DNA polymerase gamma modifies antiviral tolerance**

---

In the format provided by the  
authors and unedited

**Figure 1b**

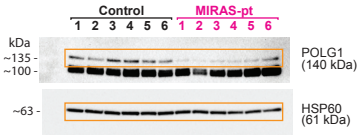

**Figure 1e**

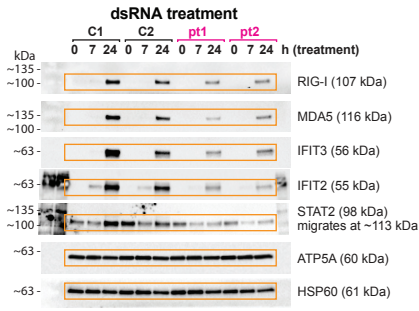

**dsDNA treatment**

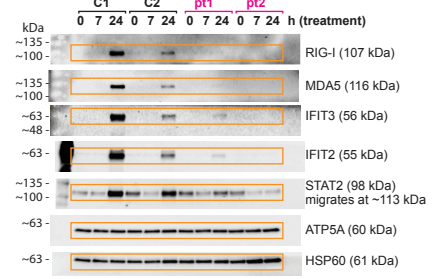

**Figure 1f**

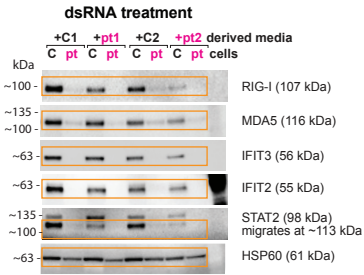

**Figure 2b**

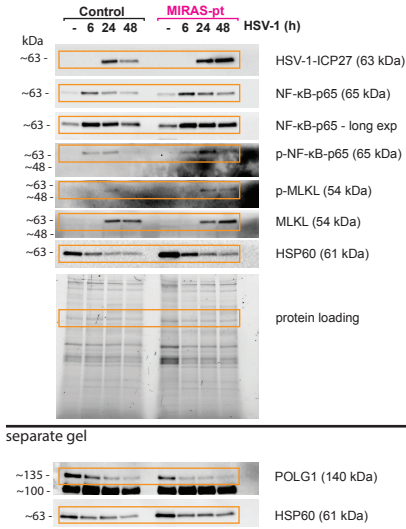

**Figure 3a**

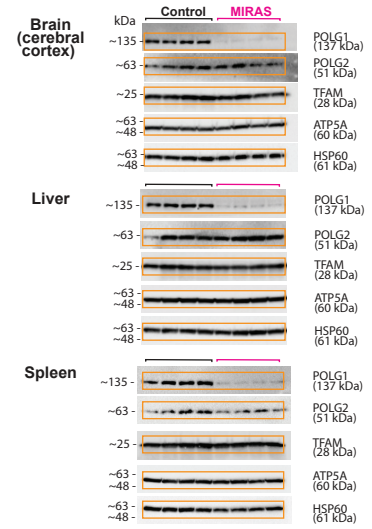

**Figure 3b**

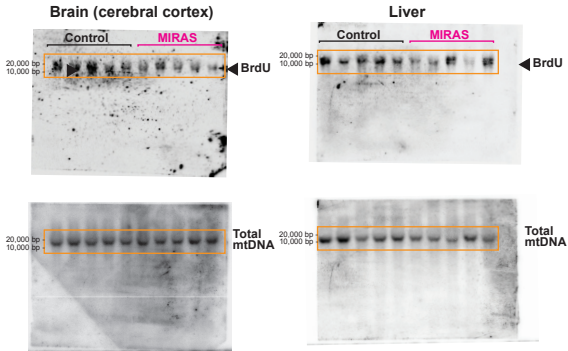

**Figure 5c**

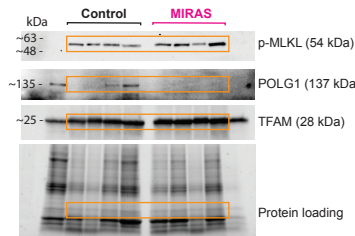

**Figure 5g**

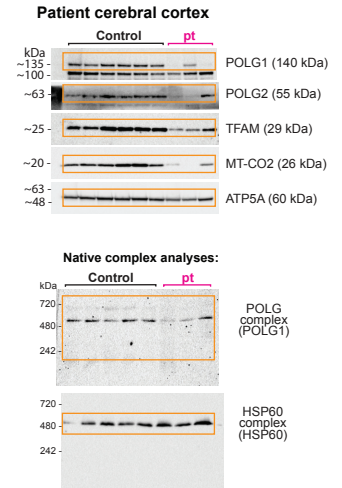

**Extended Data Figure 1d**

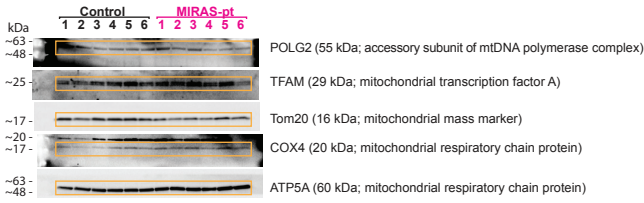

**Extended Data Figure 2b**

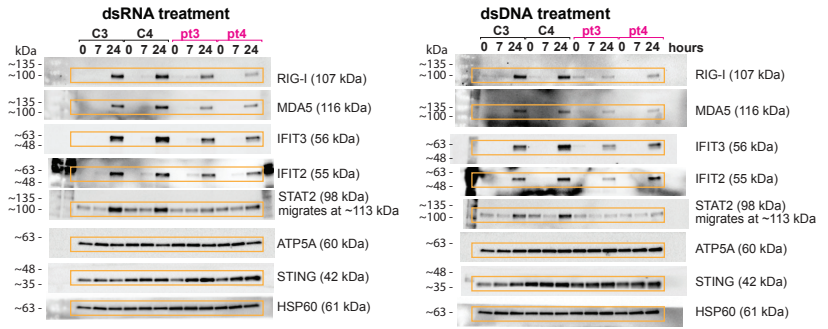

**Extended Data Figure 2c**

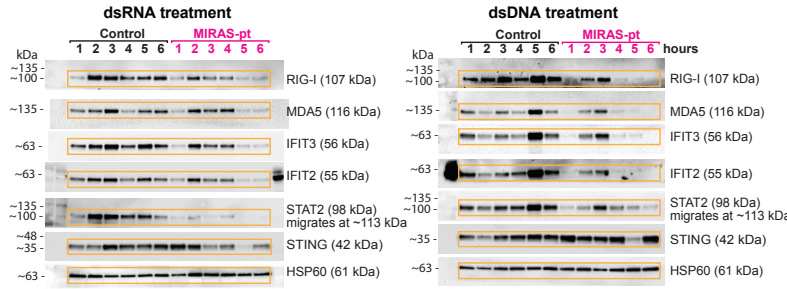

**Extended Data Figure 3a**

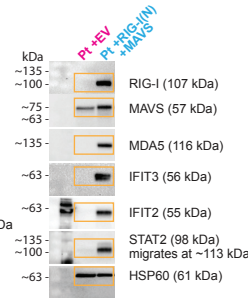

**Extended Data Figure 3c**

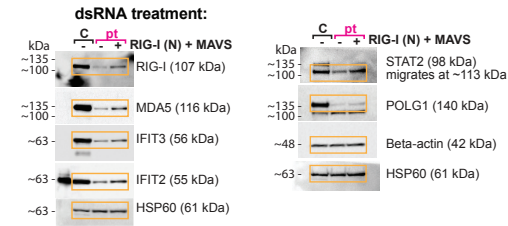

**Extended Data Figure 3e**

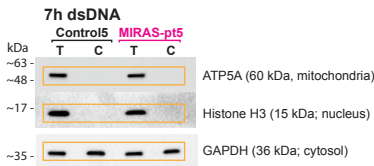

**Extended Data Figure 3g**

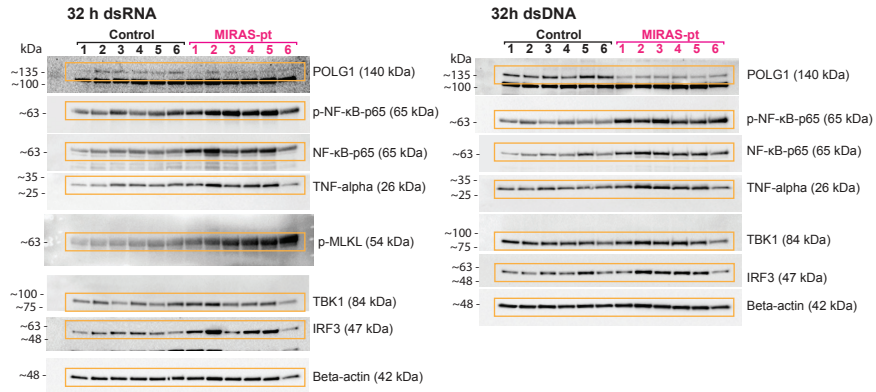

**Extended Data Figure 3i**

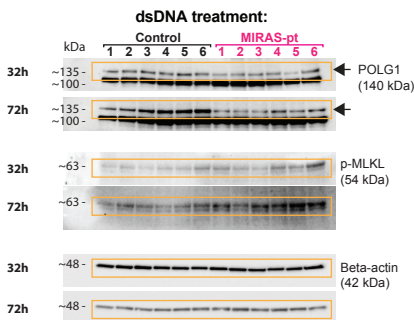

**Extended Data Figure 4a**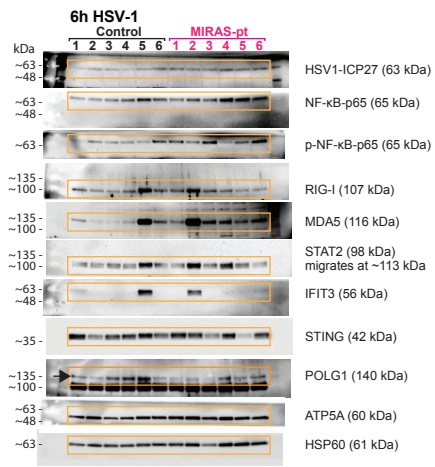**Extended Data Figure 4b**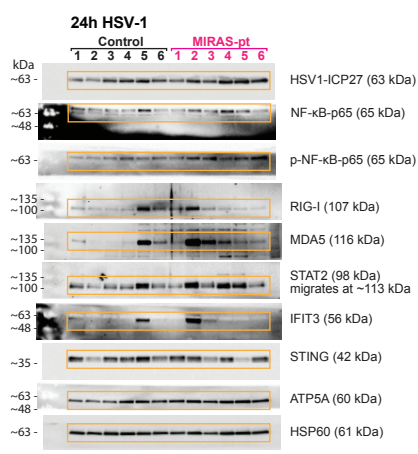**Extended Data Figure 4c**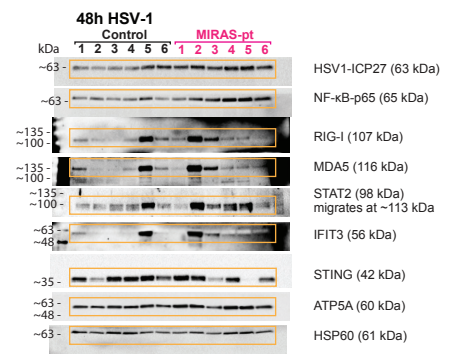**Extended Data Figure 4e**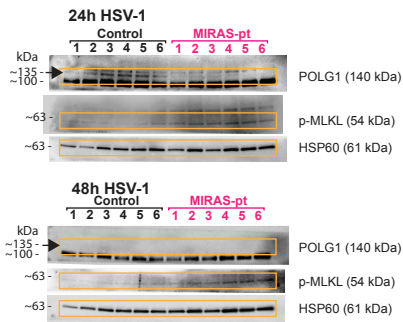**Extended Data Figure 5b**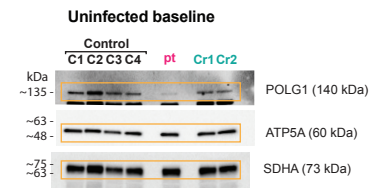**Extended Data Figure 5c**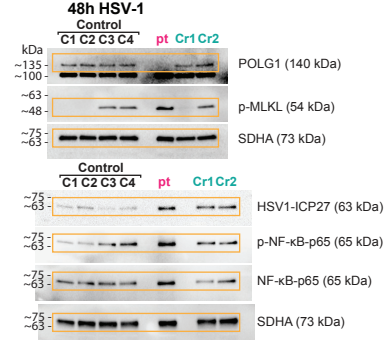**Extended Data Figure 5e**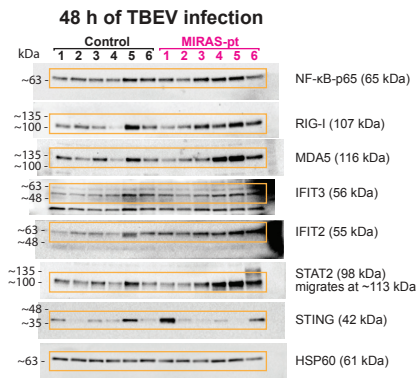**Extended Data Figure 5f**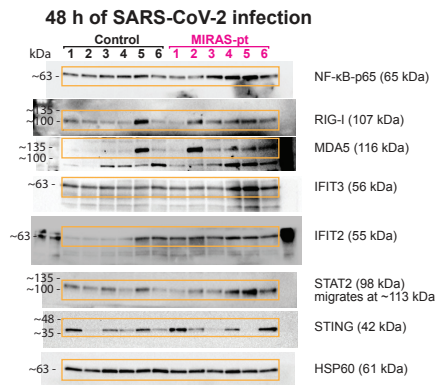**Extended Data Figure 5g**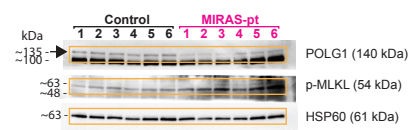**Extended Data Figure 5h**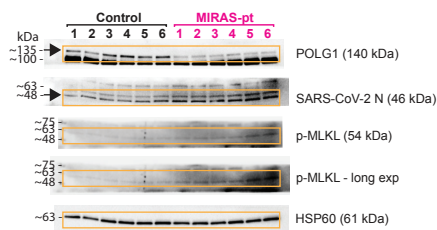**Extended Data Figure 6c**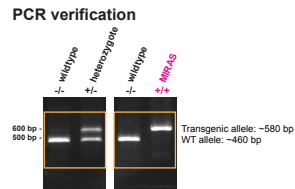**Extended Data Figure 7b**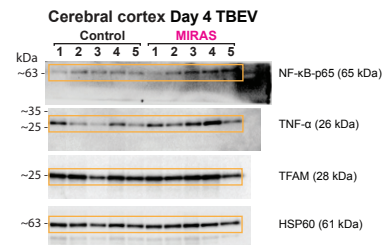**Extended Data Figure 8a**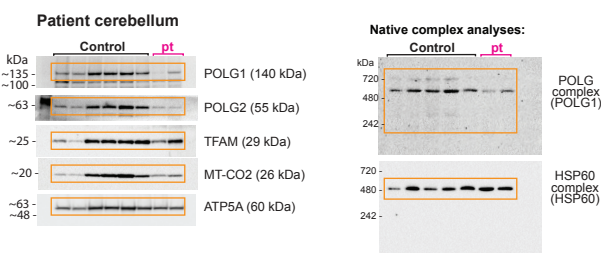

Supplement: 41586_2024_7260_MOESM1_ESM.pdf [file 41586_2024_7260_MOESM1_ESM.pdf]
